# Supplementary material for: Investigating antimicrobial resistance genes in Kenya, Uganda and Tanzania cattle using metagenomics
Source: PeerJ journal article supplement (doi:10.7717/peerj.17181), 2024-04-22

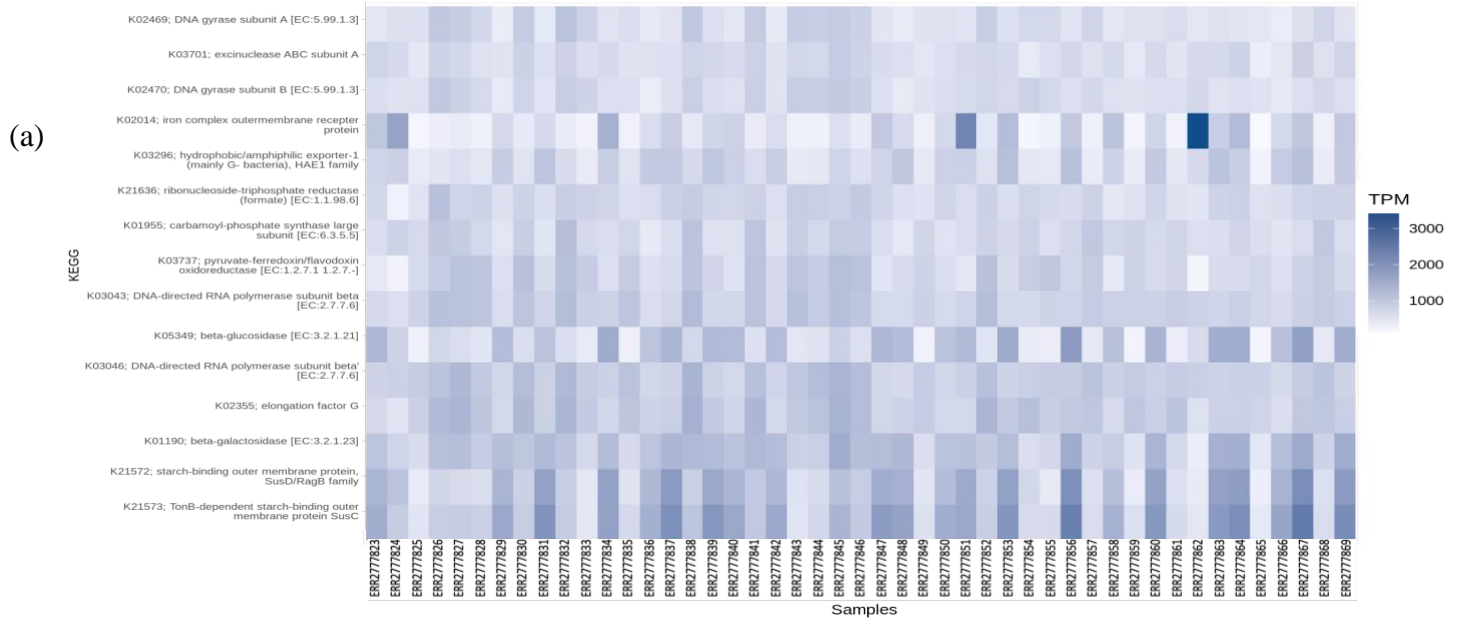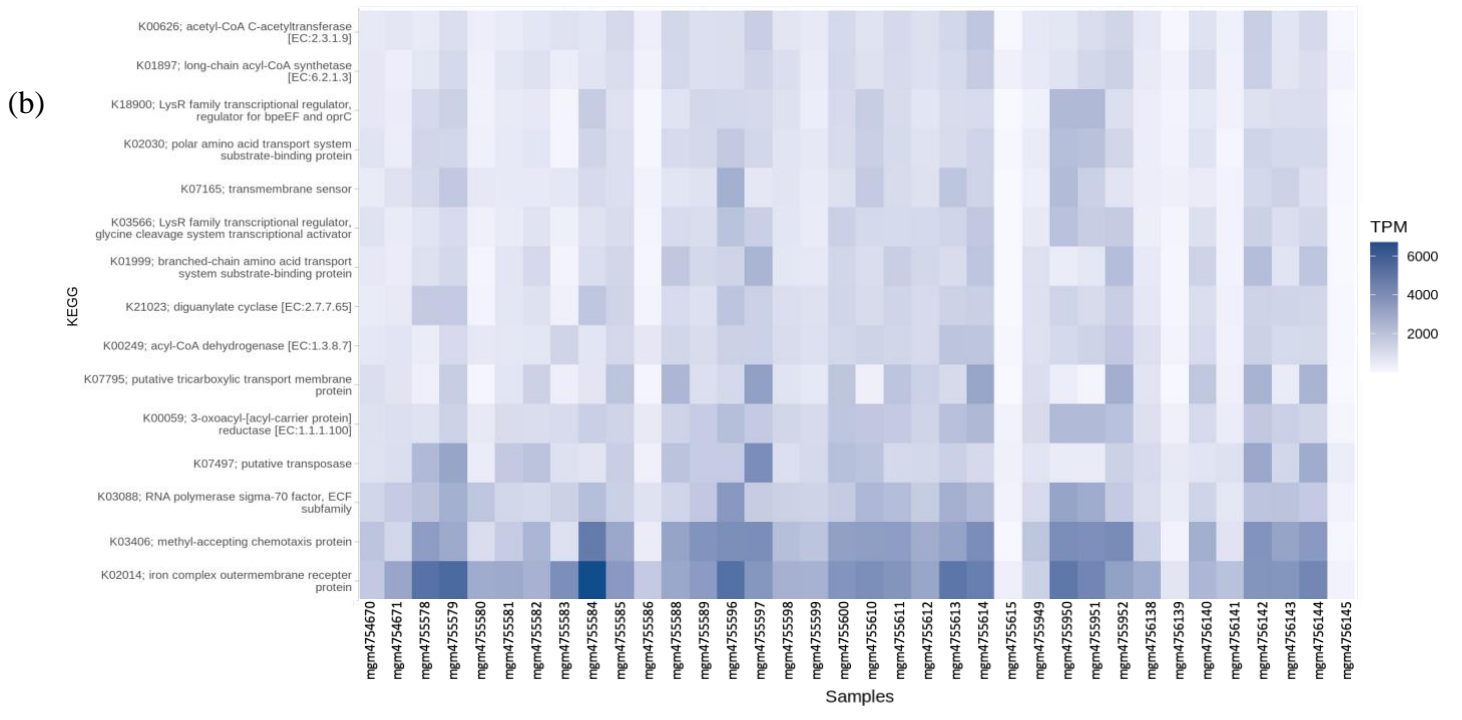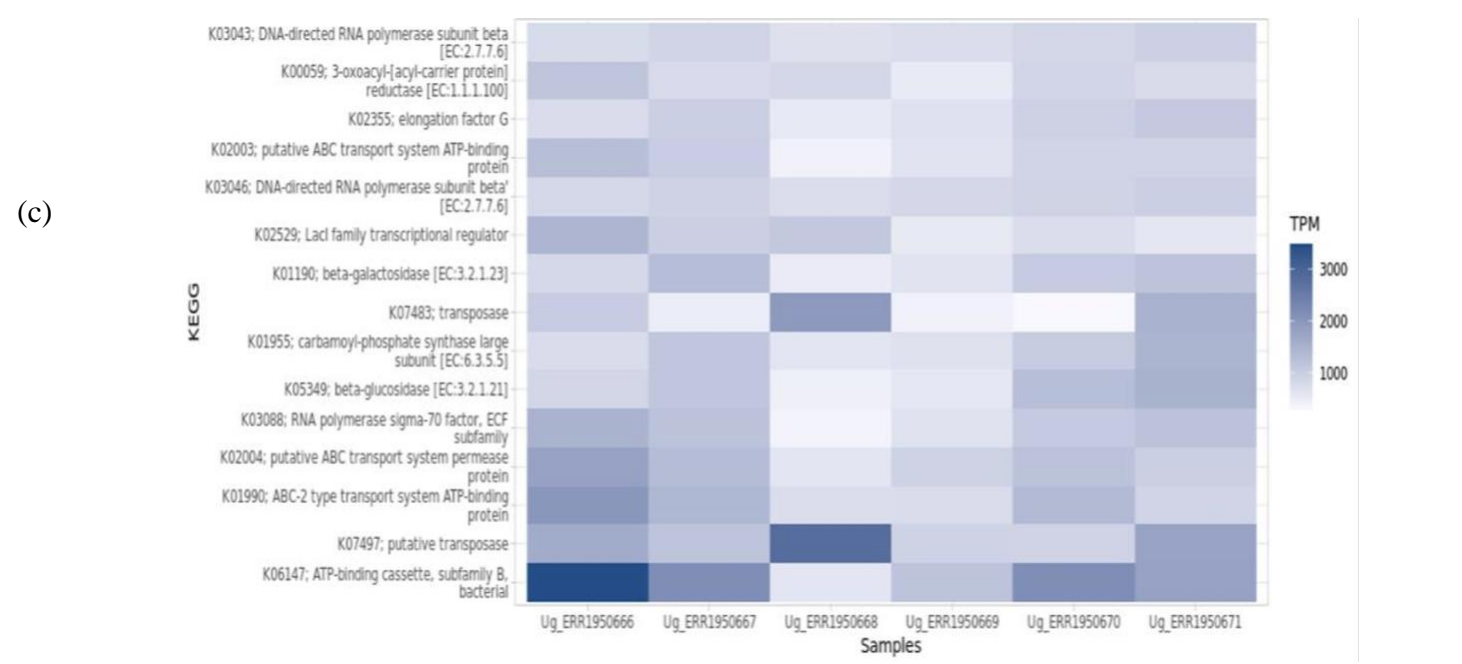

Supplement: FigS3.pdf [file FigS3.pdf]
