# Supplementary material for: Investigating antimicrobial resistance genes in Kenya, Uganda and Tanzania cattle using metagenomics
Source: PeerJ journal article supplement (doi:10.7717/peerj.17181), 2024-04-22

(a)

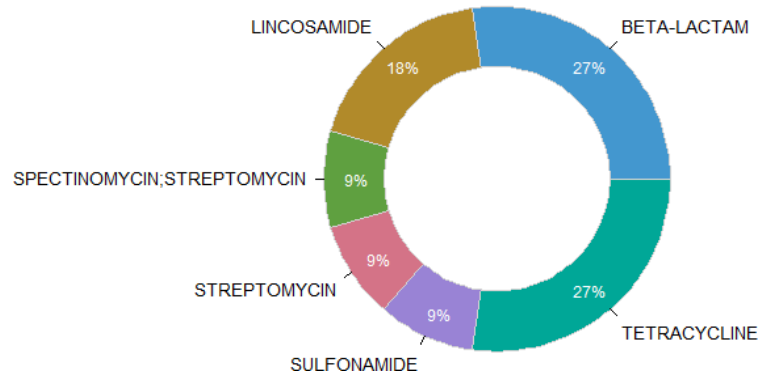

(b)

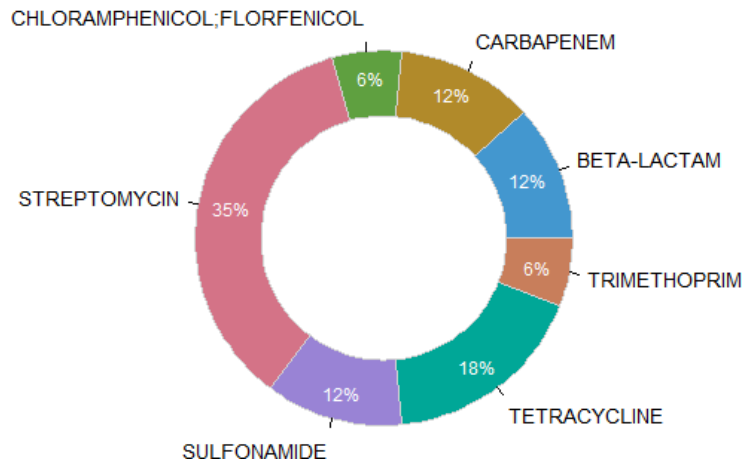

(c)

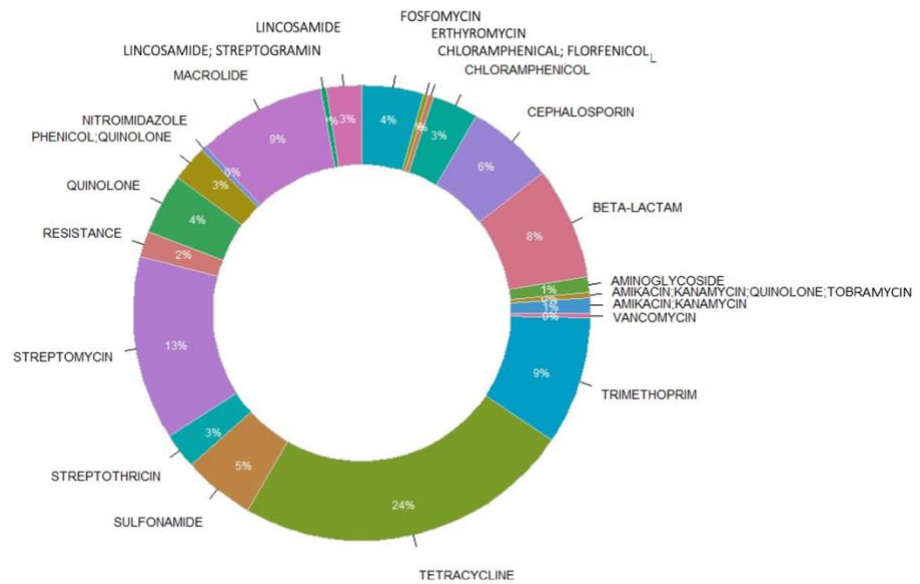

Supplement: FigS4.pdf [file FigS4.pdf]
